# Supplementary material for: A one-pot two-step synthesis of tertiary alcohols combining the biocatalytic laccase/TEMPO oxidation system with organolithium reagents in aerobic aqueous media at room temperature
Source: Royal Society of Chemistry journal article supplement (doi:10.1039/d1cc06460f), 2021-01-01
Supplement: d1cc06460f1.pdf [file d1cc06460f1.pdf]

## Supplementary Information

# A one-pot two-step synthesis of tertiary alcohols combining the biocatalytic laccase/TEMPO oxidation system with organolithium reagents in aerobic aqueous media at room temperature

Marina Ramos-Martín,<sup>a</sup> Ramón Lecuna,<sup>a</sup> Luciana Cicco,<sup>b</sup> Paola Vitale,<sup>b</sup> Vito Capriati,<sup>b</sup> Nicolas Ríos-Lombardía,<sup>c</sup> Javier Gonzalez-Sabín,<sup>c,\*</sup> Alejandro Presa Soto<sup>a,\*</sup> and Joaquín García-Álvarez<sup>a,\*</sup>

<sup>a</sup> *Departamento de Química Orgánica e Inorgánica (IUQOEM), Centro de Innovación en Química Avanzada (ORFEO-CINQA), Facultad de Química, Universidad de Oviedo, E-33071, Oviedo, Spain*

<sup>b</sup> *Dipartimento di Farmacia-Scienze del Farmaco, Università di Bari "Aldo Moro", Consorzio C.I.N.M.P.I.S., Via E. Orabona 4, Bari I-70125, Italy*

<sup>c</sup> *EntreChem SL, Vivero Ciencias de la Salud. Santo Domingo de Guzmán, 33011, Oviedo, Spain.*

## Table of Contents

|                                                        |     |
|--------------------------------------------------------|-----|
| <b>1.- General Methods</b>                             | S2  |
| <b>2.- Protocols</b>                                   | S3  |
| <b>3.- Characterization of new compounds 3g and 3j</b> | S5  |
| <b>4.- NMR spectra data</b>                            | S6  |
| <b>5.- Infrared spectra of compounds 3g and 3j</b>     | S16 |
| <b>6.- References</b>                                  | S17 |

## 1.- General Methods

All reagents were obtained from commercial suppliers and used without further purification. Alcohols **1a-f** were purchased from commercial source. Laccase from *Trametes versicolor* or *Rhus Vernicifera* and TEMPO were purchased from Sigma Aldrich. Organolithium and organomagnesium reagents were purchased from Sigma Aldrich: *i*) 2.5 M solution of *n*-BuLi in hexanes; *ii*) 1.6 M solution of MeLi in Et<sub>2</sub>O; *iii*) 1.4 M solution of *s*-BuLi in cyclohexane; *iv*) 1.7 M solution of *t*-BuLi in pentane; *v*) 1.9 M solution of PhLi in dibutyl ether; and *vi*) 1.0 M solution of PhMgBr in THF. Concentrations of all organolithium reagents were checked by titration with *L*-menthol,<sup>1</sup> and for the Grignard reagent, titrating against iodine was employed.<sup>2</sup> All the rest of reagents and solvents were of the highest quality available.

NMR spectra (CDCl<sub>3</sub>) were obtained using a Bruker DPX-300 (<sup>1</sup>H, 300.13 MHz; <sup>13</sup>C{<sup>1</sup>H}, 75.4 MHz) spectrometer and employing the  $\delta$  scale (ppm) for chemical shifts. Calibration was made on the signal of the solvent (<sup>1</sup>H: CDCl<sub>3</sub>, 7.26 ppm; <sup>13</sup>C: CDCl<sub>3</sub>, 77.0 ppm). Gas chromatography (GC) analyses were performed on an Agilent Technologies 7820A chromatograph equipped with a HP-5 (30 m x 0.32 mm x 0.25  $\mu$ m) column.

Spectroscopic data of ketones **2a-f**<sup>3,4</sup> and tertiary alcohols **3a**,<sup>4</sup> **3b**,<sup>4</sup> **3c**,<sup>4</sup> **3d**,<sup>5</sup> **3e**,<sup>4</sup> **3f**,<sup>6</sup> **3h**,<sup>7</sup> **3i**<sup>7</sup> are in agreement with those reported in the literature.

## 2.- Protocols

### **General Procedure for oxidation of secondary alcohols 1a-f into ketones 2a-f promoted by the system laccase/TEMPO in water**

*T. versicolor* laccase (14 mg, 10 U/mg) and TEMPO (12 mg, 10 mol%) were added to a 0.73 mmol (0.1 mL) of the secondary alcohol **1a** in water (1 mL) and the mixture was stirred vigorously in an open-to-air vial at room temperature for 24 h (the oxidation reaction was monitored by GC analysis). Then, the reaction mixture was extracted with ethyl acetate (3 x 5 mL), the organic layers were combined, washed, dried with MgSO<sub>4</sub> and the solvents evaporated under vacuum. The identity of the resulting ketone **1a** was confirmed by <sup>1</sup>H-RMN analysis of the crude product after comparison with reported spectra.<sup>3</sup>

### **Procedure for direct conversion of 1-phenylpropan-1-ol (1a) into tertiary alcohols 3a-e through one-pot combination of the laccase/TEMPO oxidation system with the chemoselective addition of RLi/RMgX in biphasic aqueous media, at room temperature and in the presence of air**

*T. versicolor* laccase (7 mg, 10 U/mg) and TEMPO (6 mg, 10 mol%) were added to 0.365 mmol (0.05 mL) of the secondary alcohol **1a** in water (0.5 mL) and the mixture was stirred vigorously in an open-to-air vial at room temperature for 24 h (the oxidation reaction was monitored by GC analysis). Once the oxidation reaction was completed (GC analysis, 24 h), 0.5 mL of CPME were added to form a biphasic reaction medium. Next, 3 equivalents of the corresponding organolithium (RLi) or Grignard (RMgX) reagents were added to the reaction mixture at room temperature, under air. After 3 s, 2.5 mL of saturated aqueous solution of NH<sub>4</sub>Cl were added, and the mixture was extracted with ethyl acetate (3 x 5 mL). The combined organic phases were washed, dried over anhydrous MgSO<sub>4</sub>, and the solvent was concentrated *in vacuo*.

**Procedure for direct conversion of secondary alcohols 1a-f into tertiary alcohols 3e-j through one-pot combination of the laccase/TEMPO oxidation system with the chemoselective addition of PhLi in biphasic aqueous media, at room temperature and in the presence of air**

*T. versicolor* laccase (7 mg, 10 U/mg) and TEMPO (6 mg, 10 mol%) were added to a 0.365 mmol of the desired secondary alcohol **1a-f** in water (0.5 mL) and the mixture was stirred vigorously in an open-to-air vial at room temperature for 24 h (the oxidation reaction was monitored by GC analysis). Once the oxidation reaction was completed (GC analysis, 24 h), 0.5 mL of CPME were added to form a biphasic reaction medium. Next, 3 equivalents of the PhLi (0.58 mL) were added to the reaction mixture at room temperature, under air. After 3 s, 2.5 mL of saturated aqueous solution of NH<sub>4</sub>Cl were added, and the mixture was extracted with ethyl acetate (3 x 5 mL). The combined organic phases were washed, dried over anhydrous MgSO<sub>4</sub>, and the solvent was concentrated *in vacuo*.

### 3.- Characterization of new compounds 3g and 3j

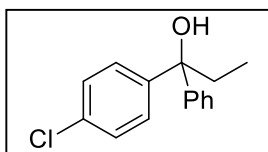

**1-(4-chlorophenyl)-1-phenylpropan-1-ol (3g):** yellow oil,  $^1\text{H}$  NMR (300 MHz,  $\text{CDCl}_3$ )  $\delta$  0.91 (t,  $J = 7.2$ , 3H), 2.08 (s, OH), 2.33 (q,  $J = 7.2$ , 2H), 7.26-7.44 (m, 9H);  $^{13}\text{C}\{^1\text{H}\}$  NMR (300 MHz,  $\text{CDCl}_3$ )  $\delta$  8.1, 34.4, 78.2, 126.0, 127.1, 127.6, 128.2, 128.3, 132.6, 145.4, 146.5; FT-IR (film,  $\text{cm}^{-1}$ ): 3510 ( $\nu_{\text{OH}}$ ); 3060, 3031 (aromatic  $\nu_{\text{CH}}$ ); 2975, 2937, 2876 ( $\nu_{\text{CH sp}^3}$ ); 1685, 1587, 1570 (aromatic  $\nu_{\text{C}=\text{C}}$ ); 1087 ( $\nu_{\text{C-OH}}$ ); 800 (aromatic  $\delta_{\text{CH}}$  *para*-substitution); 738, 701 (aromatic  $\delta_{\text{CH}}$  *mono*-substitution).

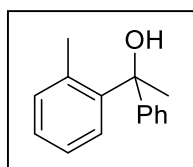

**1-phenyl-1-(o-tolyl)ethan-1-ol (3j):** yellow oil,  $^1\text{H}$  NMR (300 MHz,  $\text{CDCl}_3$ )  $\delta$  1.96 (s, 3H), 2.02 (s, 3H), 2.15 (s, OH), 7.12-7.15 (m, 1H), 7.23-7.35 (m, 7H), 7.71-7.74 (m, 1H);  $^{13}\text{C}\{^1\text{H}\}$  NMR (300 MHz,  $\text{CDCl}_3$ )  $\delta$  21.4, 32.2, 76.8, 125.3, 125.4, 126.0, 126.6, 127.7, 128.1, 132.5, 137.2, 144.6, 148.0; FT-IR (film,  $\text{cm}^{-1}$ ): 3445 ( $\nu_{\text{OH}}$ ); 3059, 3024 (aromatic  $\nu_{\text{CH}}$ ); 2973, 2927 ( $\nu_{\text{CH sp}^3}$ ); 1601, 1486, 1447 (aromatic  $\nu_{\text{C}=\text{C}}$ ); 757 (aromatic  $\delta_{\text{CH}}$  *ortho*-disubstitution); 728, 701 (aromatic  $\delta_{\text{CH}}$  *mono*-substitution).

#### 4.- NMR spectra data

##### $^1\text{H}$ and $^{13}\text{C}$ NMR spectra of 3-phenyl-heptan-3-ol (3a)

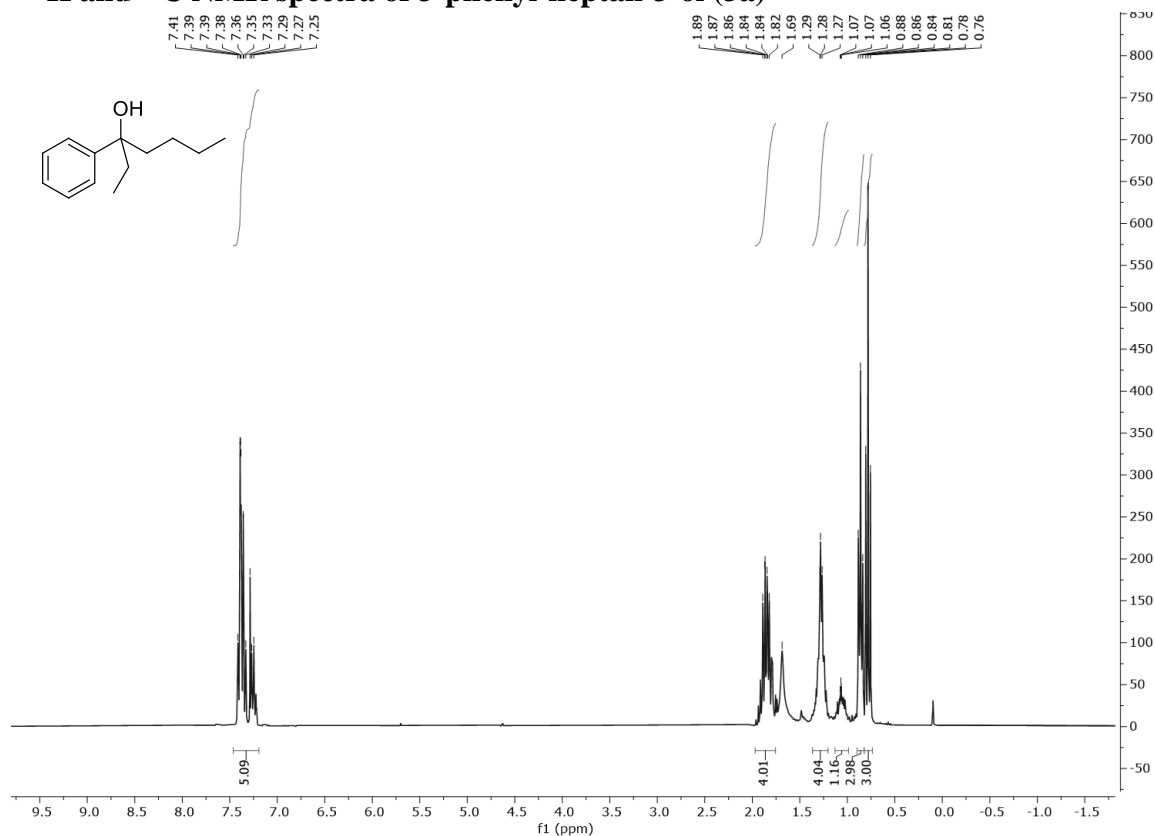

Figure S1.  $^1\text{H}$ -NMR full chart for 3a in  $\text{CDCl}_3$ .

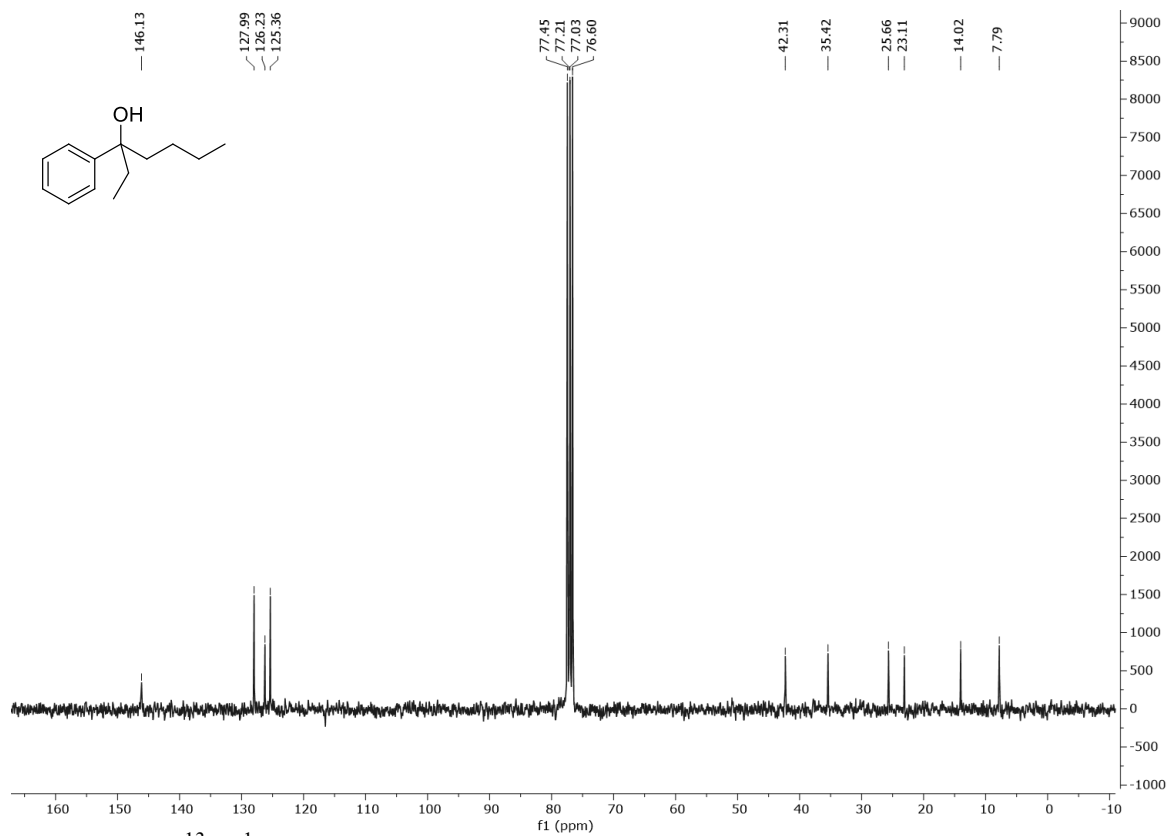

Figure S2.  $^{13}\text{C}\{^1\text{H}\}$ -NMR full chart for 3a in  $\text{CDCl}_3$ .

### $^1\text{H}$ and $^{13}\text{C}$ NMR spectra of 2-phenylbutan-2-ol (**3b**)

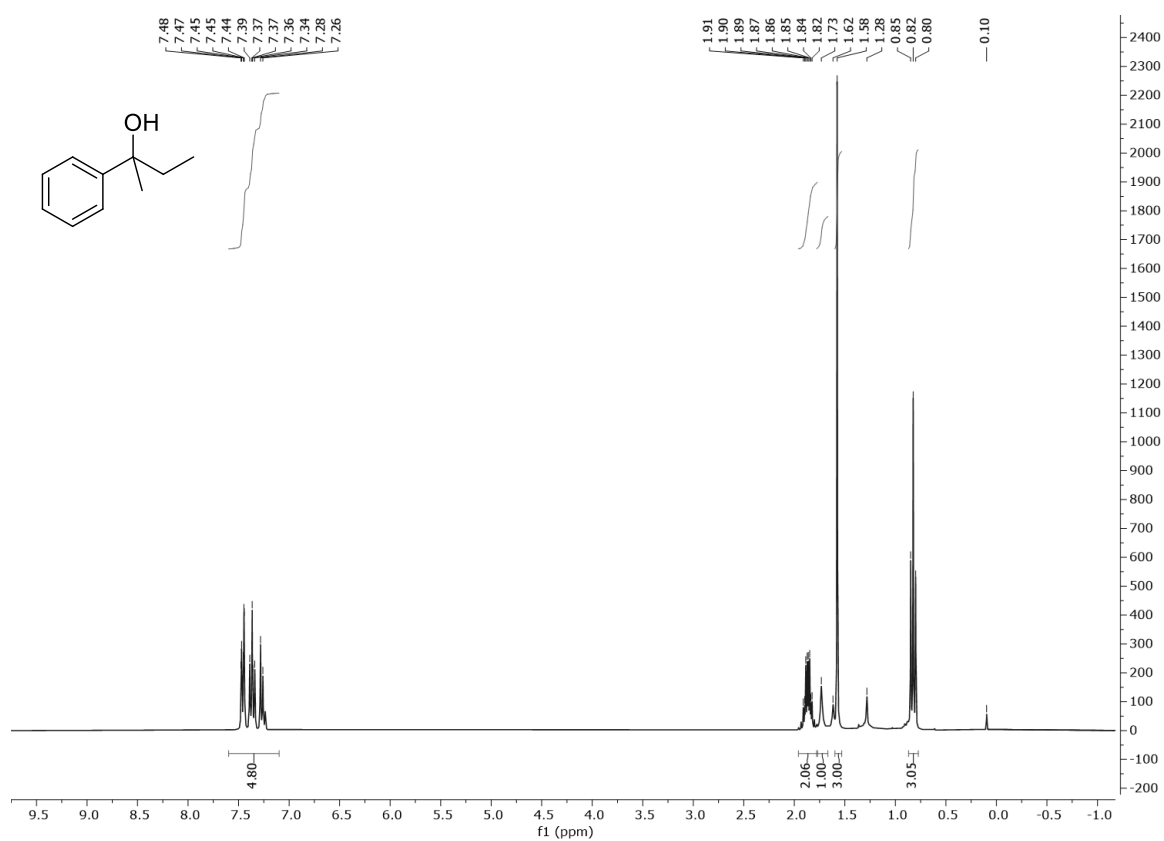

Figure S3.  $^1\text{H}$ -NMR full chart for **3b** in  $\text{CDCl}_3$ .

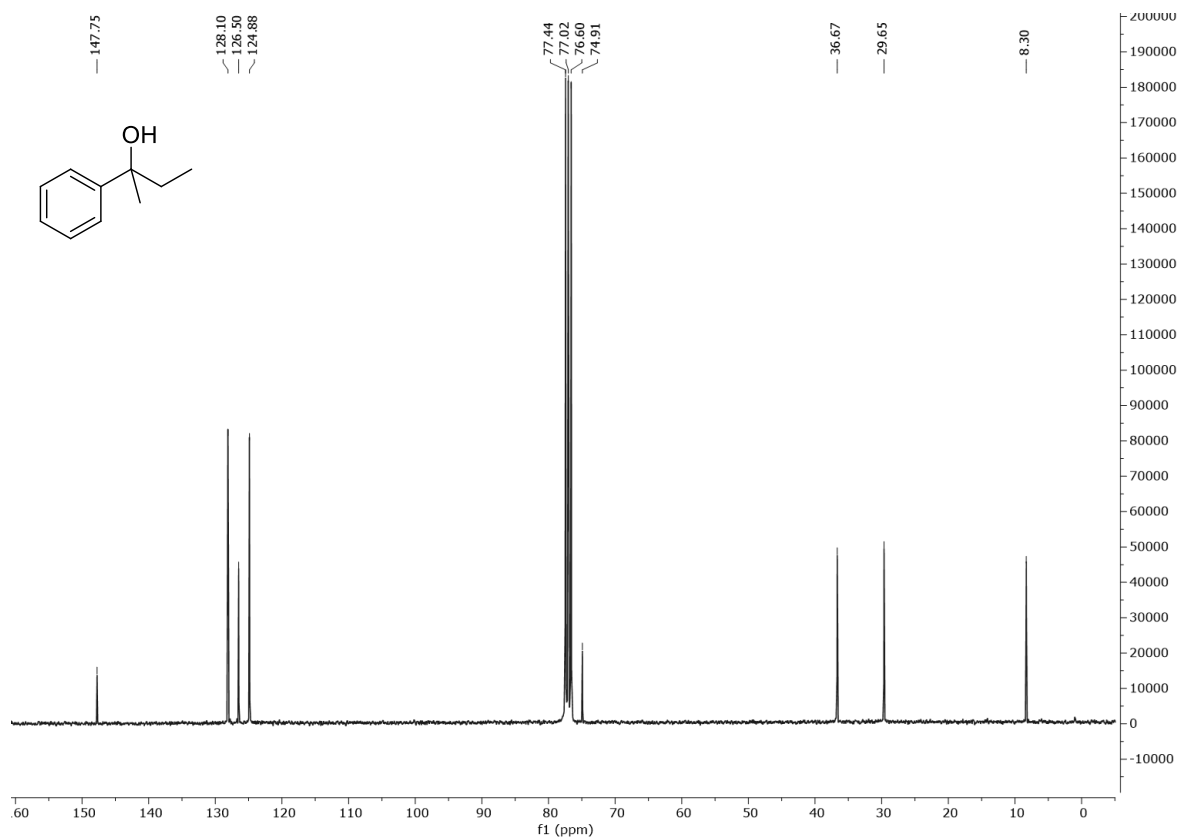

Figure S4.  $^{13}\text{C}\{^1\text{H}\}$ -NMR full chart for **3b** in  $\text{CDCl}_3$ .

**$^1\text{H}$  and  $^{13}\text{C}$  NMR spectra of 4-methyl-3-phenyl-hexan-3-ol (3c)**

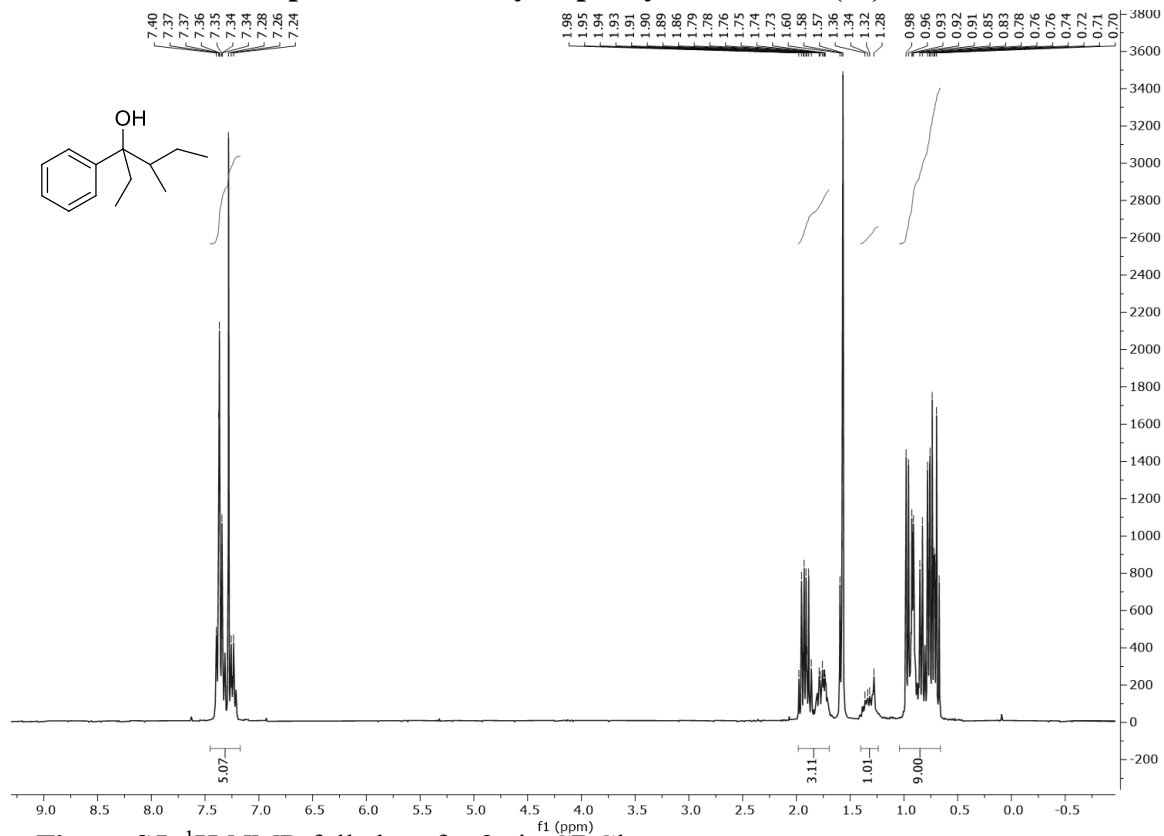

**Figure S5.**  $^1\text{H}$ -NMR full chart for **3c** in  $\text{CDCl}_3$ .

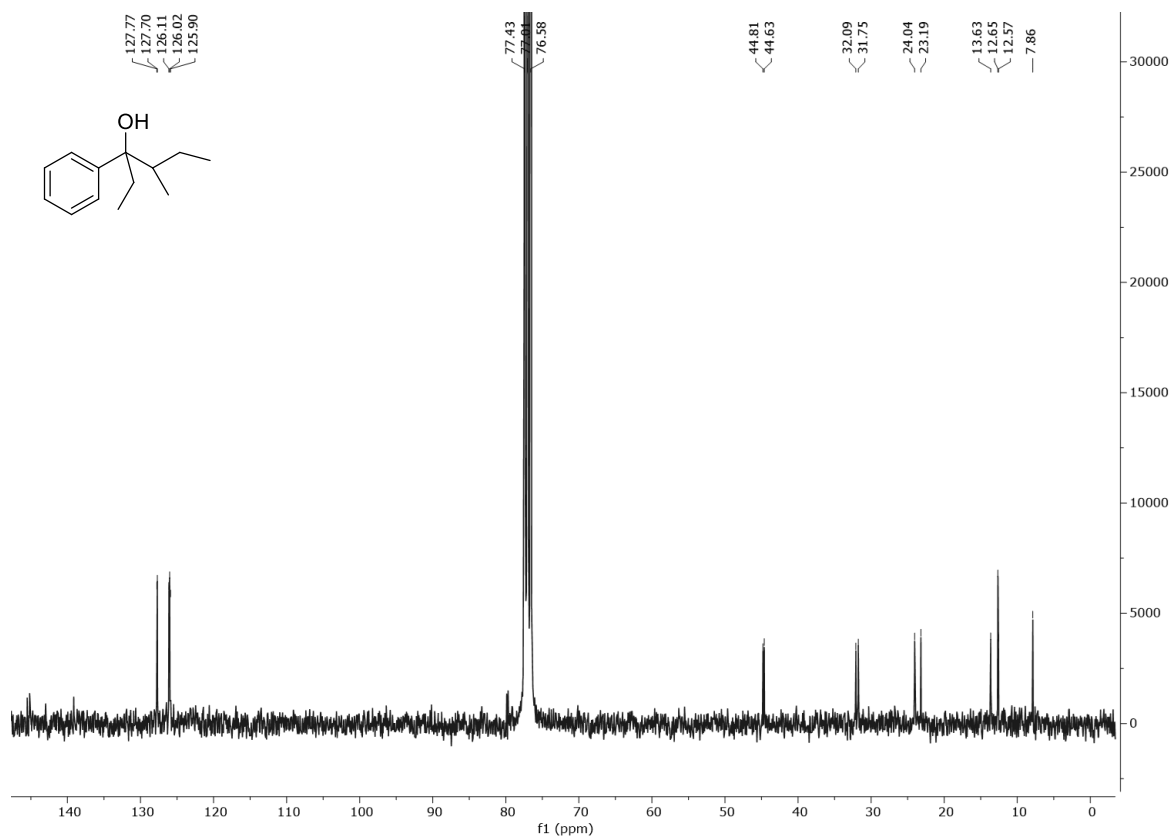

**Figure S6.**  $^{13}\text{C}\{^1\text{H}\}$ -NMR full chart for **3c** in  $\text{CDCl}_3$ .



# <sup>1</sup>H and <sup>13</sup>C NMR spectra of 2,2-dimethyl-3-phenylpentan-3-ol (3d)

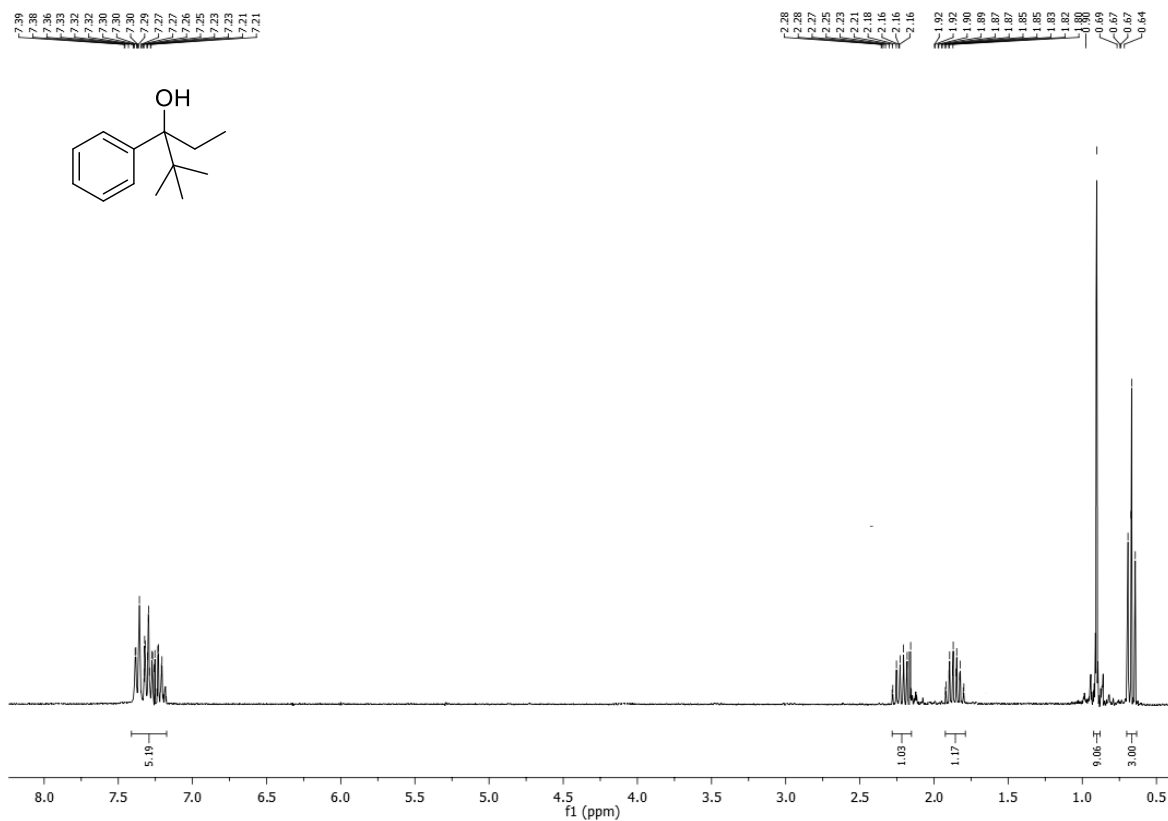

Figure S7. <sup>1</sup>H-NMR full chart for 3d in CDCl<sub>3</sub>

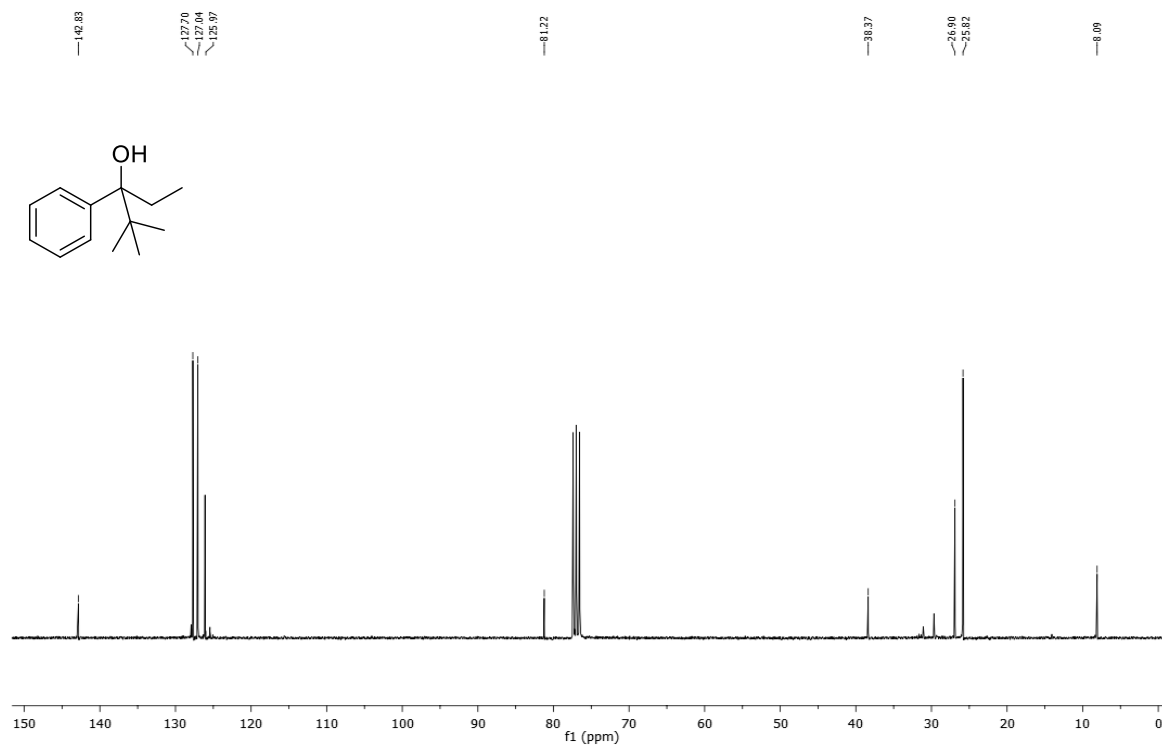

Figure S8. <sup>13</sup>C{<sup>1</sup>H}-NMR full chart for 3d in CDCl<sub>3</sub>.

**$^1\text{H}$  and  $^{13}\text{C}$  NMR spectra of 4-methyl-3-phenyl-hexan-3-ol (3e)**

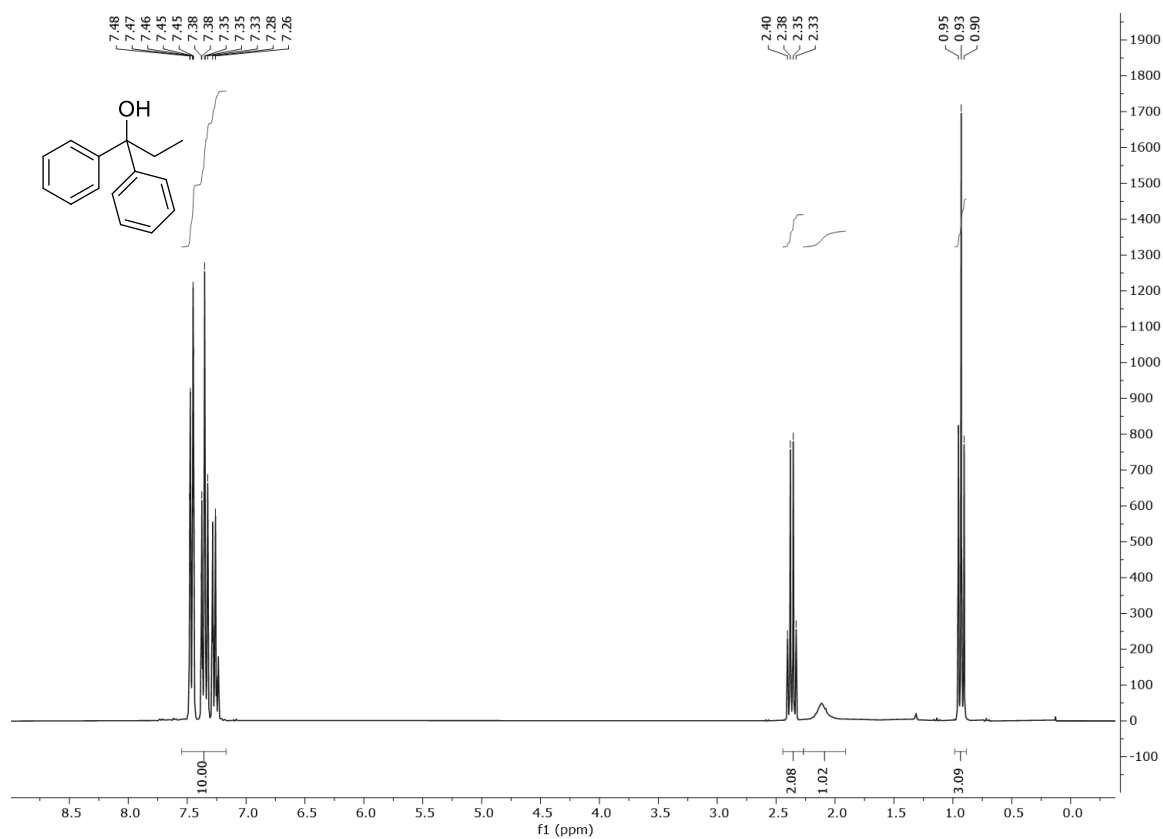

**Figure S9.**  $^1\text{H}$ -NMR full chart for 3e in  $\text{CDCl}_3$ .

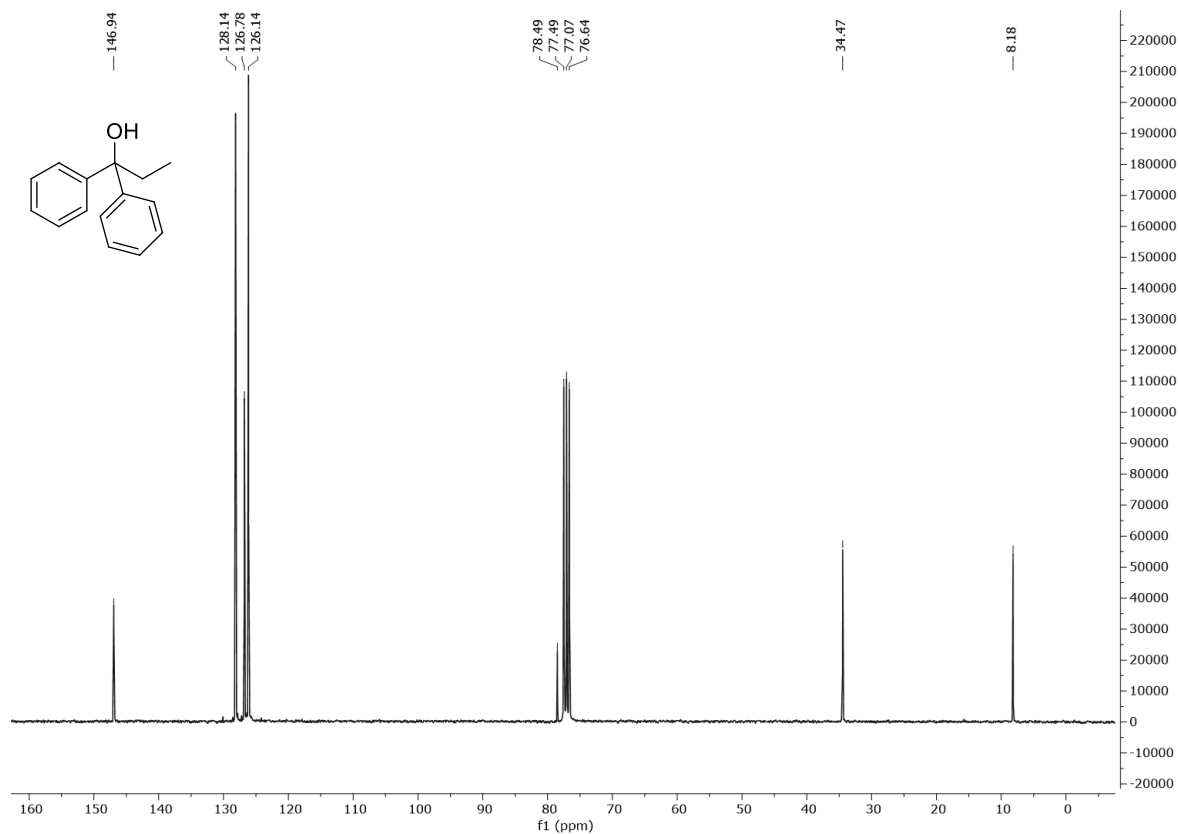

**Figure S10.**  $^{13}\text{C}\{^1\text{H}\}$ -NMR full chart for 3e in  $\text{CDCl}_3$ .

### $^1\text{H}$ and $^{13}\text{C}$ NMR spectra of 1,1-diphenylethan-1-ol (**3f**)

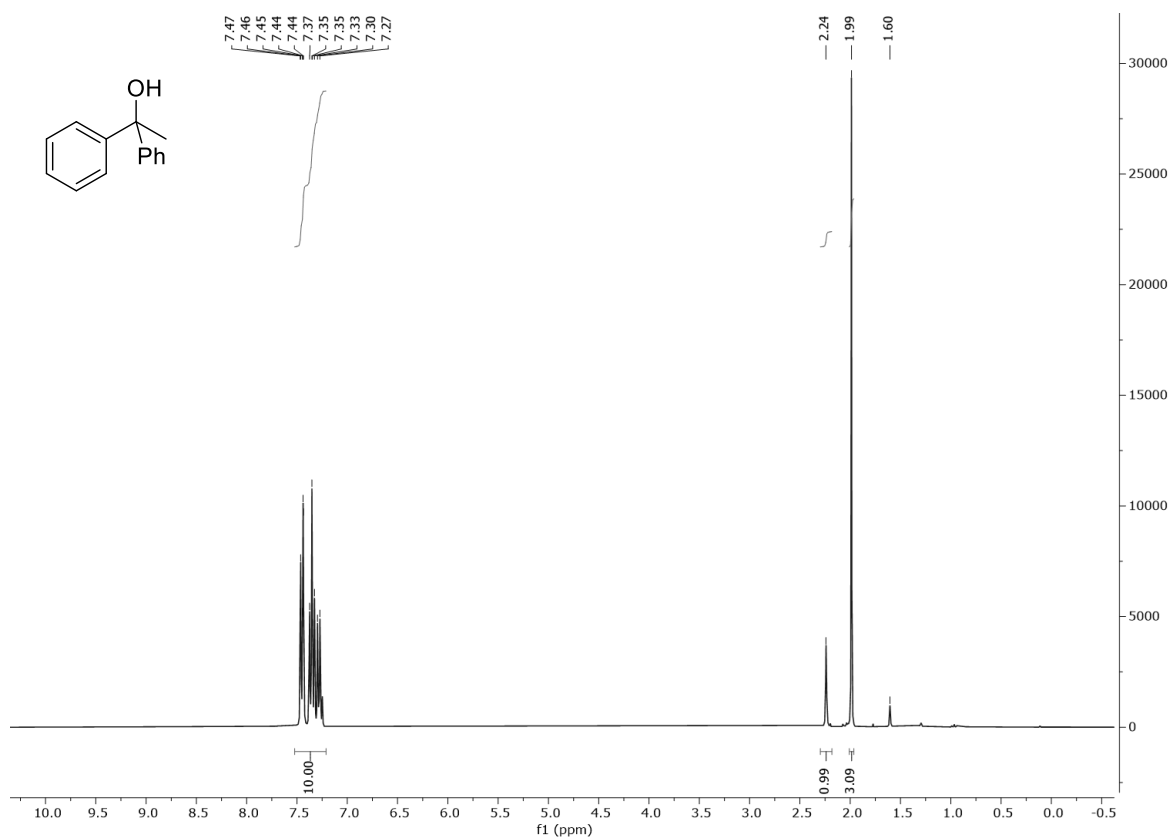

**Figure S11.**  $^1\text{H}$ -NMR full chart for **3f** in  $\text{CDCl}_3$ .

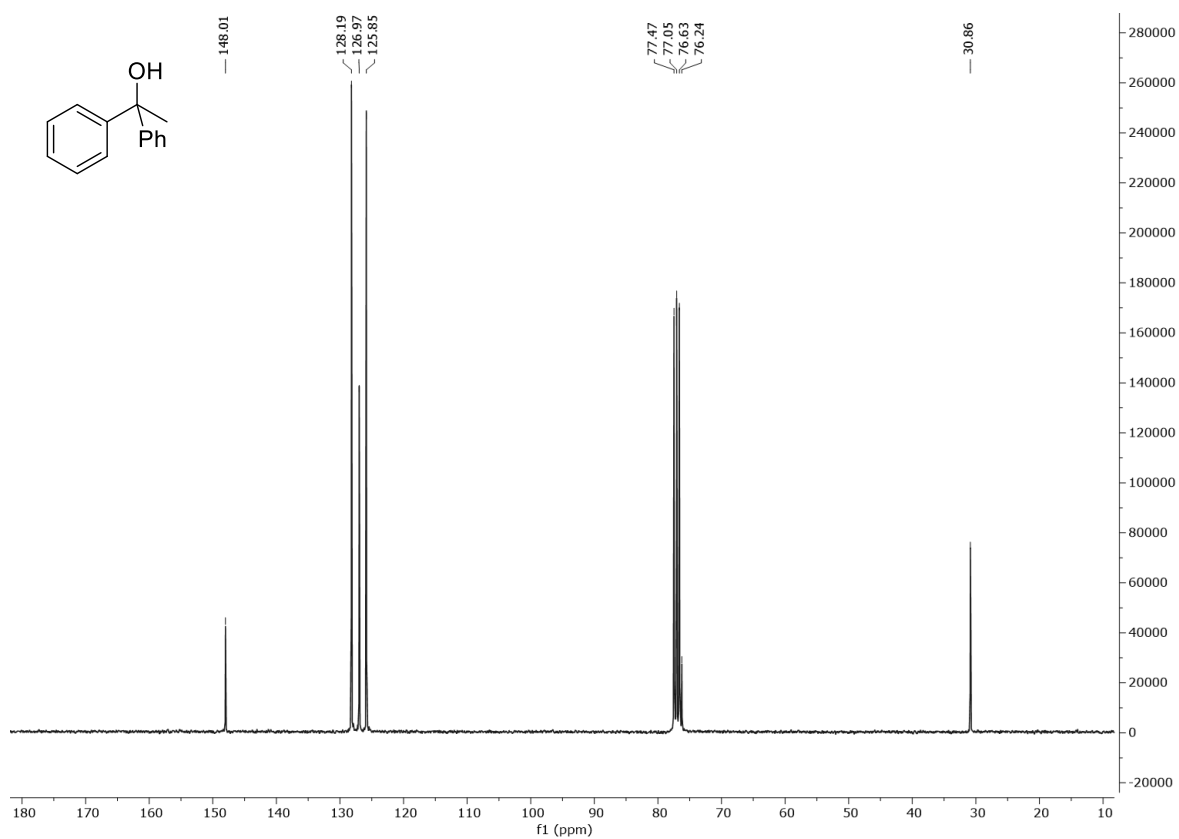

**Figure S12.**  $^{13}\text{C}\{^1\text{H}\}$ -NMR full chart for **3f** in  $\text{CDCl}_3$ .

### $^1\text{H}$ and $^{13}\text{C}$ NMR spectra of 1-(4-chlorophenyl)-1-phenylpropan-1-ol (**3g**)

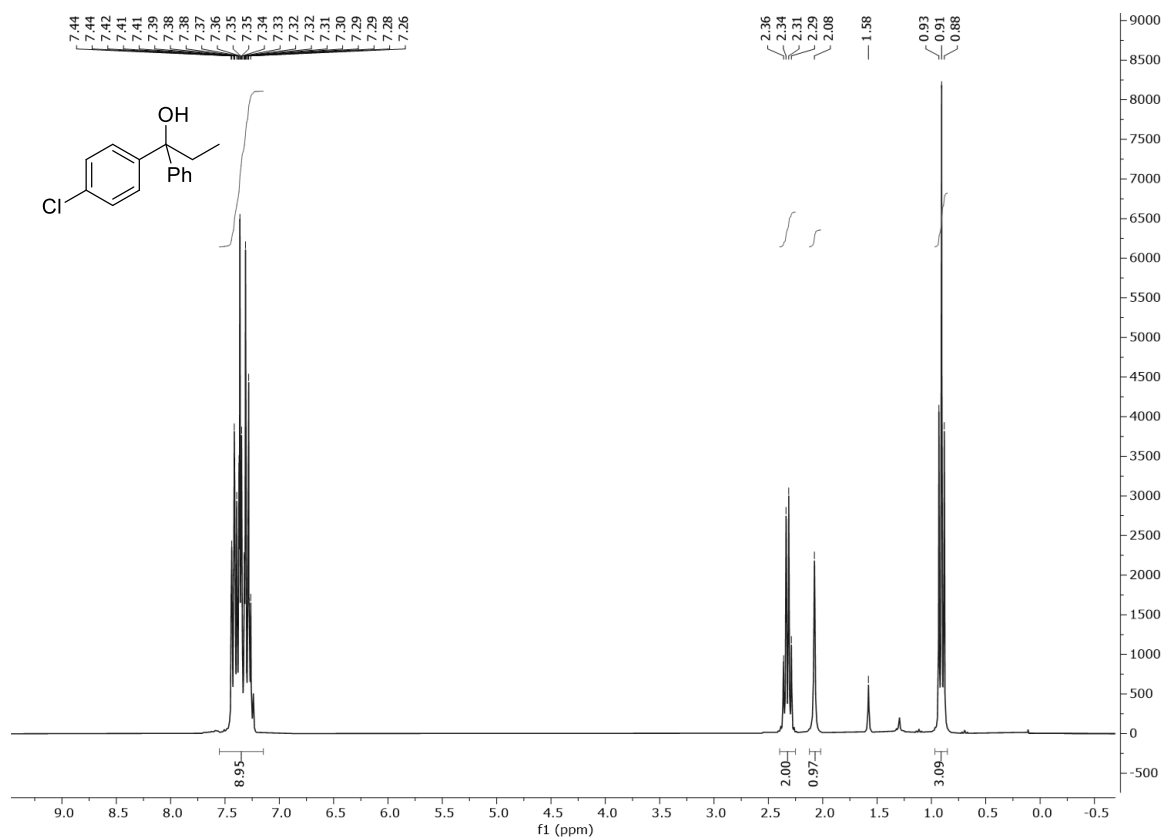

**Figure S13.**  $^1\text{H}$ -NMR full chart for **3g** in  $\text{CDCl}_3$ .

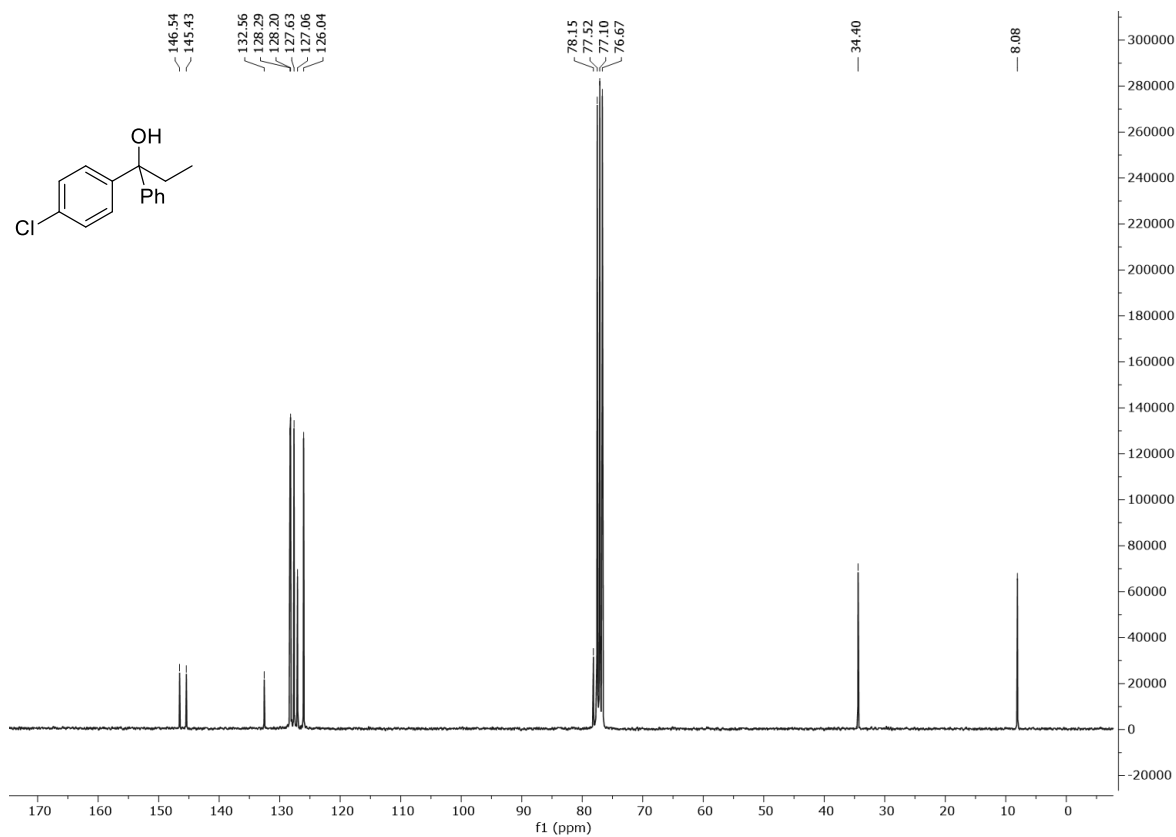

**Figure S14.**  $^{13}\text{C}\{^1\text{H}\}$ -NMR full chart for **3g** in  $\text{CDCl}_3$ .

### $^1\text{H}$ and $^{13}\text{C}$ NMR spectra of 1-(4-bromophenyl)-1-phenylethan-1-ol (**3h**)

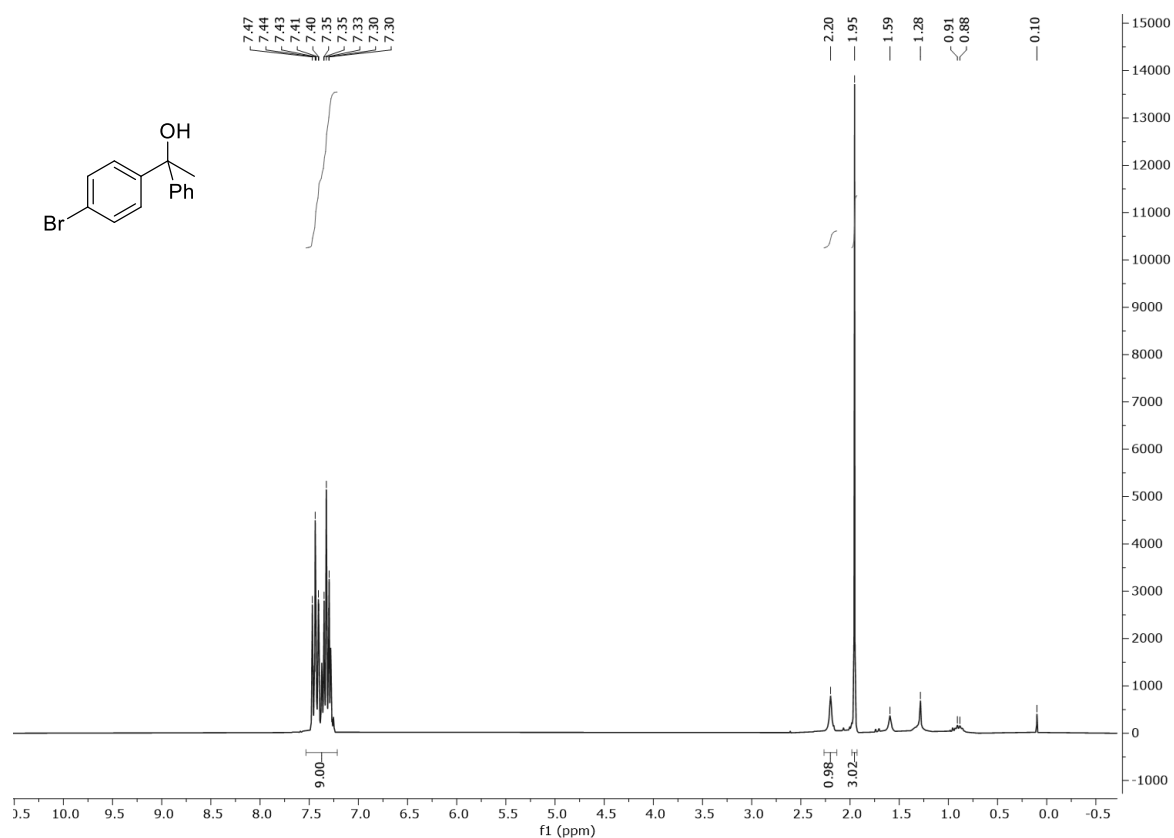

**Figure S15.**  $^1\text{H}$ -NMR full chart for **3h** in  $\text{CDCl}_3$ .

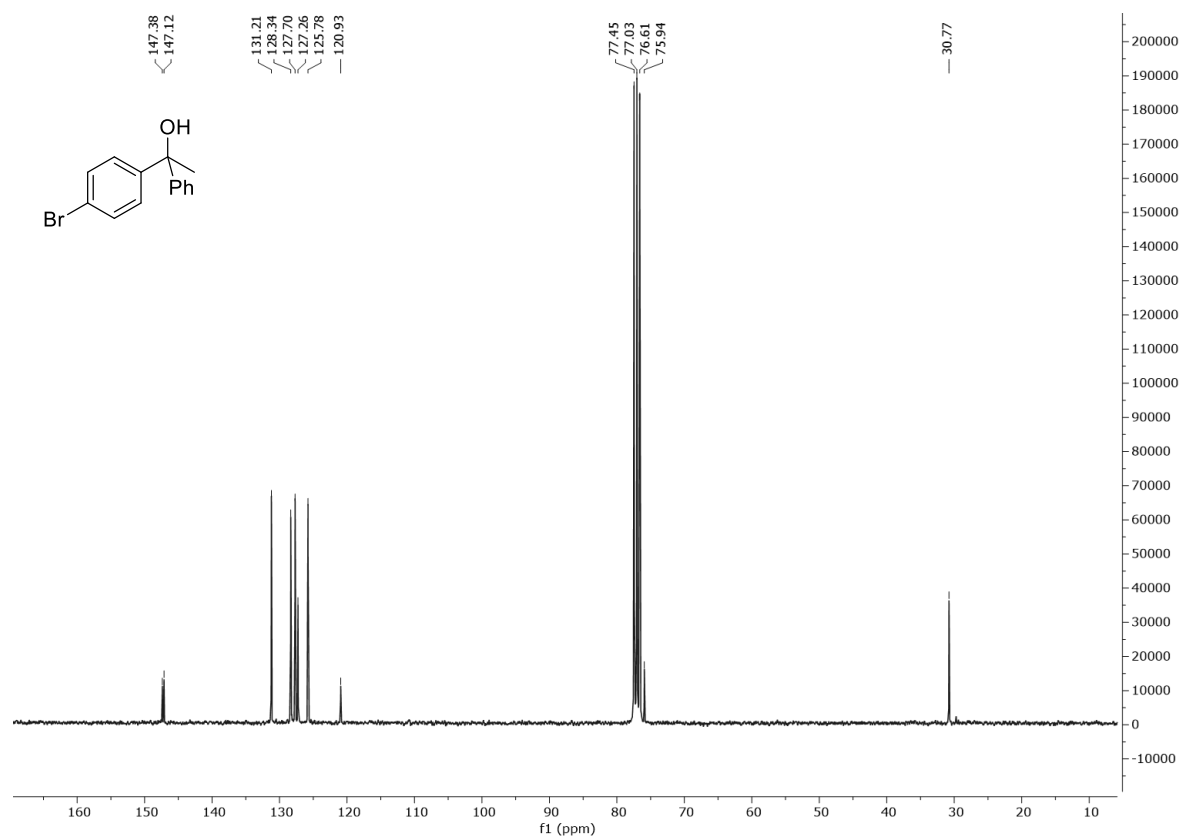

**Figure S16.**  $^{13}\text{C}\{^1\text{H}\}$ -NMR full chart for **3h** in  $\text{CDCl}_3$ .

### $^1\text{H}$ and $^{13}\text{C}$ NMR spectra of 1-phenyl-1-(p-tolyl)propan-1-ol (**3i**)

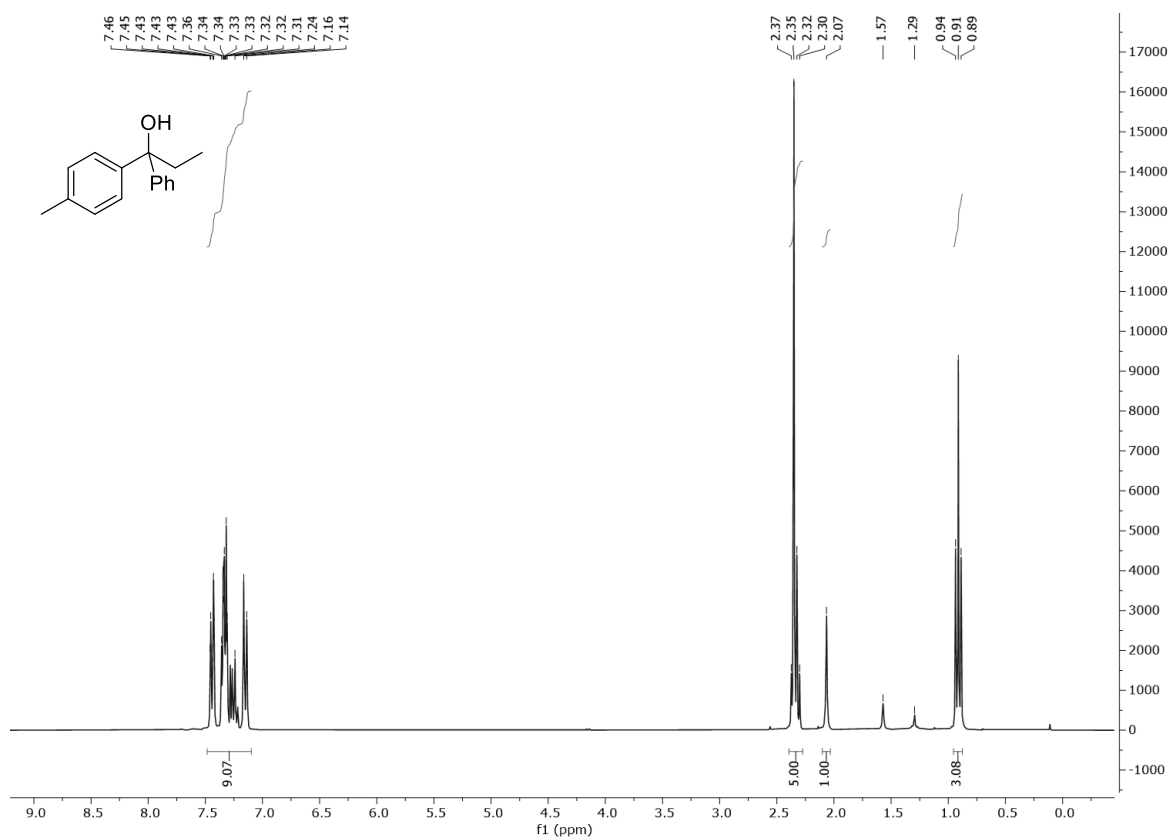

**Figure S17.**  $^1\text{H}$ -NMR full chart for **3i** in  $\text{CDCl}_3$ .

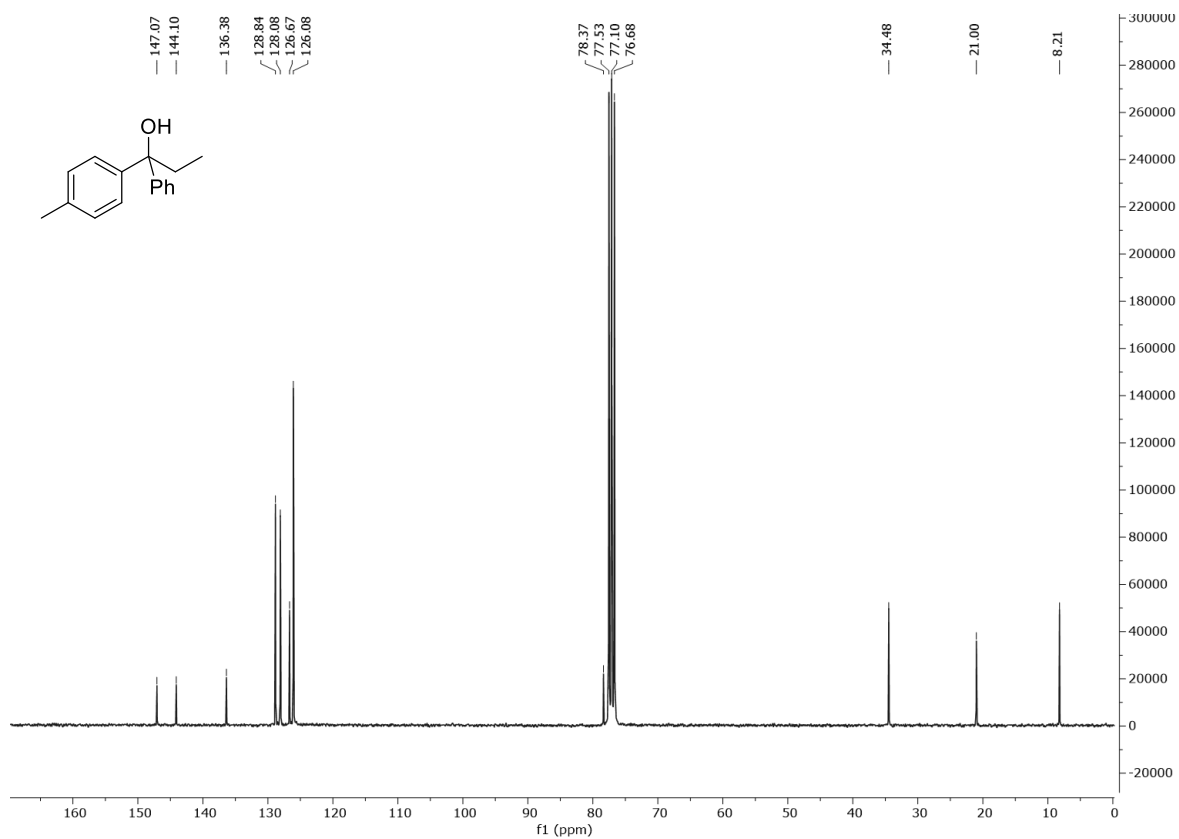

**Figure S18.**  $^{13}\text{C}\{^1\text{H}\}$ -NMR full chart for **3i** in  $\text{CDCl}_3$ .

### $^1\text{H}$ and $^{13}\text{C}$ NMR spectra of 1-phenyl-1-(o-tolyl)ethan-1-ol (**3j**)

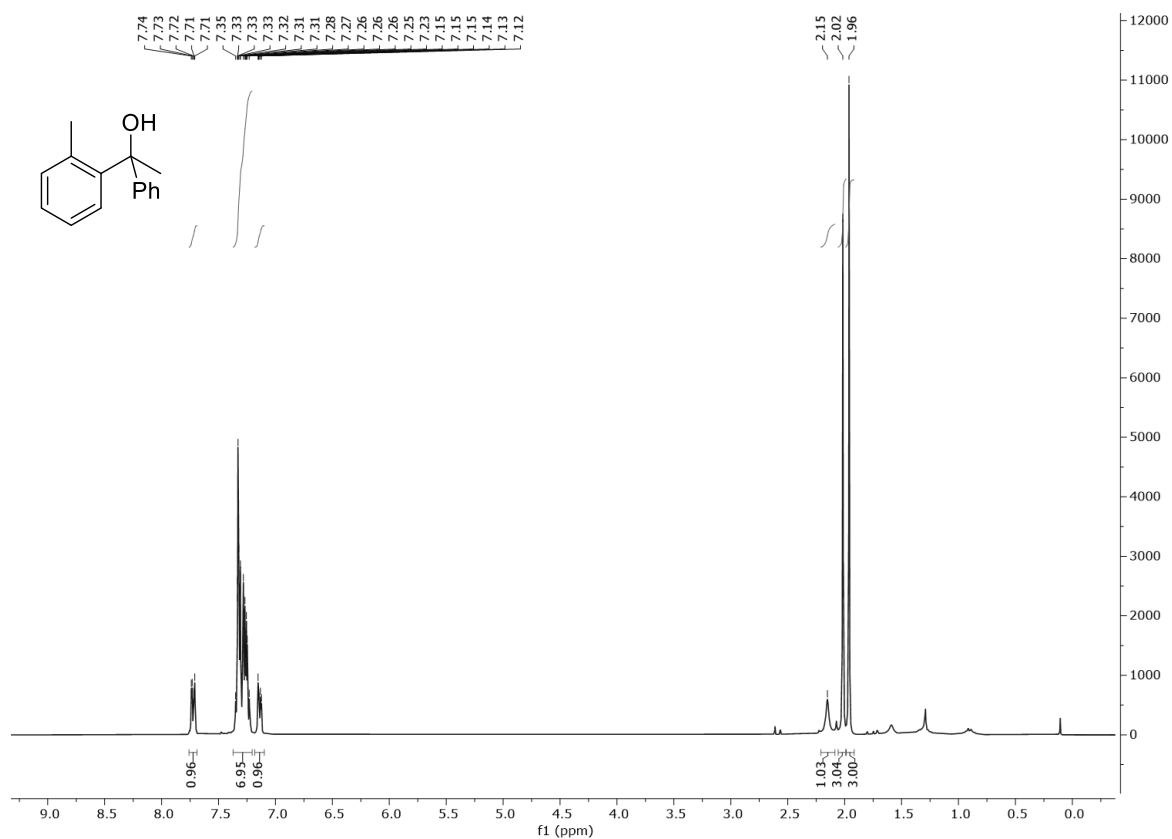

Figure S19.  $^1\text{H}$ -NMR full chart for **3j** in  $\text{CDCl}_3$ .

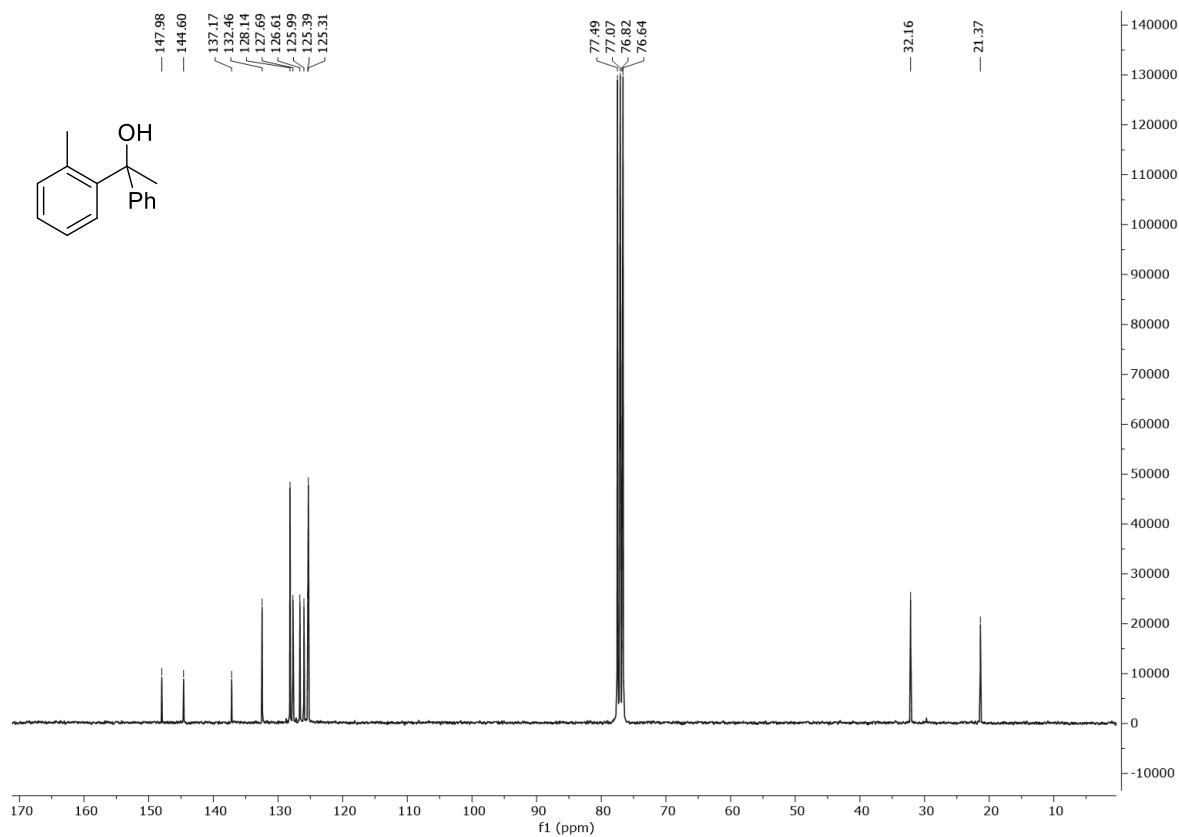

Figure S20.  $^{13}\text{C}\{^1\text{H}\}$ -NMR full chart for **3j** in  $\text{CDCl}_3$ .

## 5.- Infrared spectra of compounds 3g and 3j

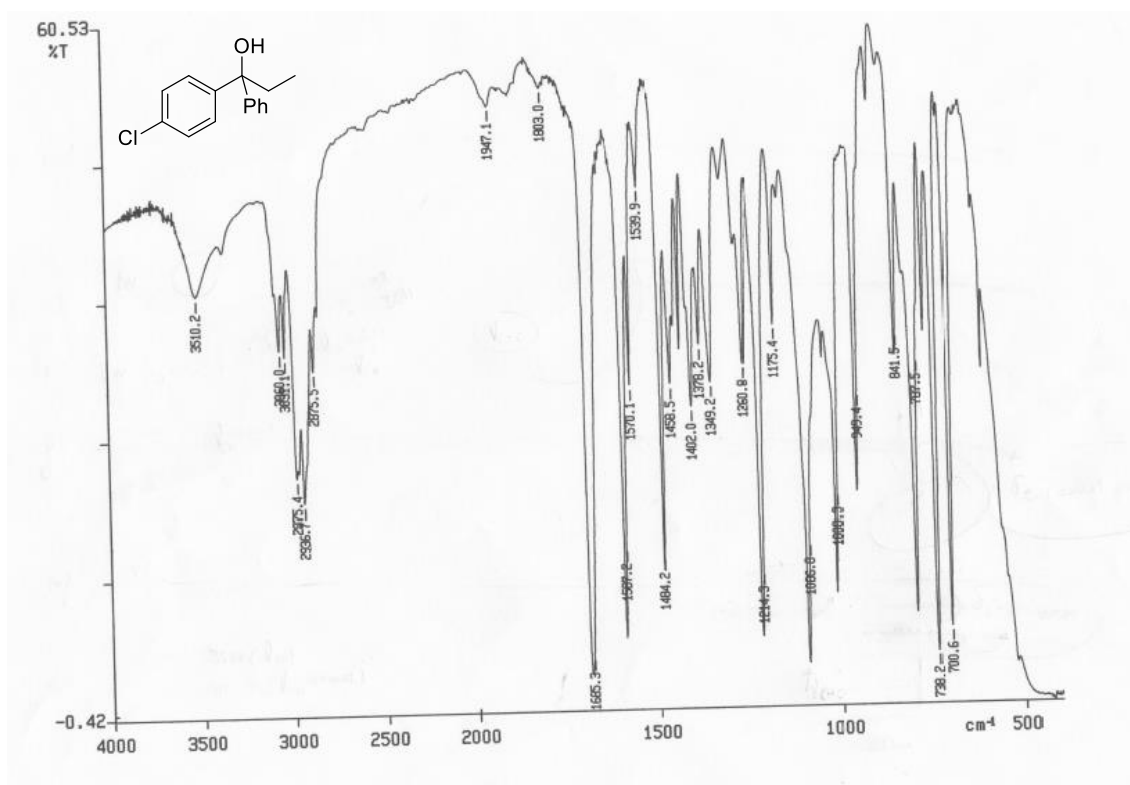

Figure S21. Infrared spectra of 3g.

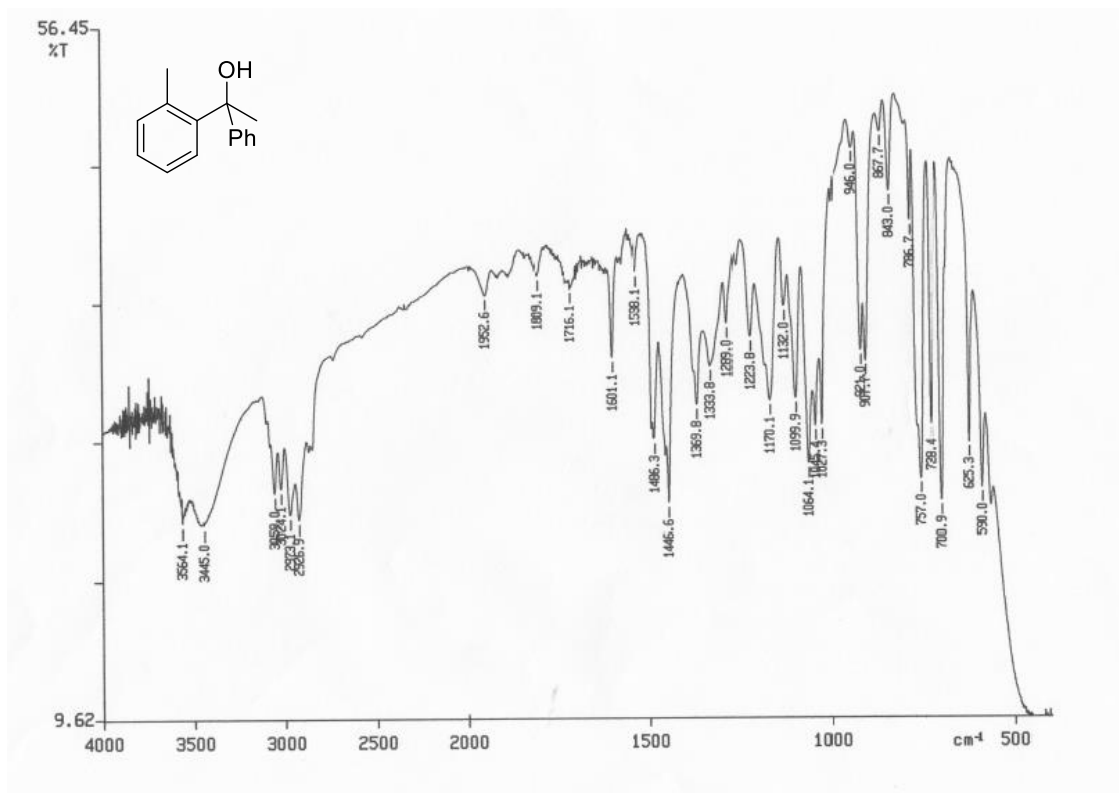

Figure S22. Infrared spectra of 3j.



## 6.- References

- [1] (a) S. C. Watson and J. F. Eastham, *J. Organomet. Chem.*, 1967, **9**, 165; (b) H.-S. Lin and L. A. Paquette, *Synth. Commun.*, 2007, **24**, 2503.
- [2] A. Krasovskiy and P. Knochel, *Synthesis*, 2006, **5**, 890.
- [3] E. Liardo, N. Ríos-Lombardía, F. Morís, J. González-Sabín and F. Rebolledo, *Eur. J. Org. Chem.*, 2018, 3031.
- [4] D. Elorriaga, M. J. Rodríguez-Álvarez, N. Ríos-Lombardía, F. Morís, A. Presa Soto, J. González-Sabín, E. Hevia and J. García-Álvarez, *Chem. Commun.*, 2020, **56**, 8932
- [5] S. Andersson and T. Drakenberg, *Org. Magn. Reson.*, 1983, **21**, 730.
- [6] M. Hantano, O. Ito, S. Suzuki and K. Ishihara, *Chem. Commun.*, 2010, **46**, 2674.
- [7] H. Namai, H. Ikeda, N. Kato and K. Mizuno, *J. Phys. Chem. A*, 2007, **11**, 4436
